# Supplementary material
Source: PubMed Central journal article supplement (PMC5435233)
Supplement: NIHMS857408-supplement-1.pdf [file NIHMS857408-supplement-1.pdf]

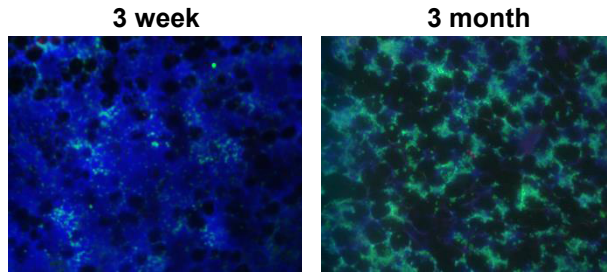

**Supplementary Figure 1. Fluorescence microscopy of BM sections from 3-week-old and 3-month-old rabbits.** Bone marrow sections were stained with Hoechst (blue) and anti-CD11b (green). Large black areas in 3-month-old sample represent fat spaces. Data are representative 7 rabbits.
